# Supplementary material
Source: publisher figshare collection journal article supplement (https://gsajournals.figshare.com/articles/dataset/_/15062469)
Supplement: Supplementary file 1 [file 1]

## Sheet: HLH-12 in Caenorhabditis
Location of hlh-12 in Caenorhabditis species
Caenorhabditis species	Name of protein and/or location of gene	chromosome*	flanking 5'	flanking 3'	species #
zanzibari	CSP26.scaffold00142	?	?	?	26
tribulationis	CSP40.g2756.t1	IV	tag-77 (C28C12.10)	?	40
	CSP40.scaffold00130 49586-50202	IV	spp-10 (-)	spp-10 (-)
sinica	CSINI.Csp5_scaffold_00017.g1100.t2	IV	spp-10 (-)	spp-10 (-)
nigoni		IV			9
briggsae	CBG18498 modified = WB Cbr-HLH-12	IV	spp-8 (+)	CBG18497(+)
	CBG18500	IV	spp-8 (-)	spp-10 (-)
remanei	CREMA.FL82_21175-RA	IV	spp-10.3 (-)	spp-10.4(-)
	CREMA.FL82_21173-RA	IV	spp-10.2 (-)	spp-10.3 (-)
latens	CLATE.FL83_17050-RA	IV	spp-10.3 (-)	spp-10.4(-)	23
	CLATE.FL83_21579-RA	IV	spp-10.2 (-)	spp-10.3 (-)
wallacei	NODE_12414 draft genome assembly nCwal.1.1	?	?	?	16
tropicalis	Scaffold630 Caenorhabditis_sp11_JU1373-3.0.1, GCA_000186765.1, Oct 2014	?	?	?	11
doughertyi	CDOUG.scaffold00421	IV	spp-10 exon 8 (-)	spp-10 exon 6 (-)
brenneri	CBN09862 Cbre_Contig373	IV	CBN21988 (-)	spp-10.2 (-)
	second copy Cbre_Contig373	IV	spp-10 (-)	spp-10 (-)
	CBN22480 Cbre_Contig418 6641-7374	IV	spp-10 exon 7 (-)	spp-10 exon 6 (-)
	Cbre_Contig418 ~14364-15292	IV	spp-10 exon 10 (-)	spp-10 exon 8 (-)
	Cbre_Contig418 ~18510-19218	IV	spp-10 exon 7 (-)	spp-10 exon 10 (-)
	Cbre_Contig418 ~23248-23713	IV	spp-10 exon 8 (-)	spp-10 exon 5 (-)
	CBN20486 Cbre_Contig51	X	srg-64	?
inopinata	CSP34.Sp34_40067511.t1	IV	spp-10 (-)	spp-10 (-)	34
elegans	C28C12.8	IV	spp-10 exon 7 (-)	spp-10 exon 6 (-)
kamaaaina	CKAMA.g959.t1 CKAMA.scaffold89_cov34	IV	spp-10 exon 8 (-)	spp-10 exon 6 (-)	15
waitukubuli	CSP39.g24095.t1	?	?	?	39
	CSP39.g30021.t1	?	?	?
panamensis	CSP28.g9170.t1 CSP28.scaffold157_cov79	IV	spp-10 exon 8 (-)	spp-10 (-)	28
nouraguensis	CNOUR.g12008.t1 CNOUR.scaffold97_1180	IV	spp-10 exon 8 (-)	spp-10 (-)	17
becei	CSP29.g3548.t1 CSP29.scaffold83_cov175	IV	spp-10 (-)	spp-10 (-)	29
macrosperma	caenorhabditis_macrosperma_JU2083_clcSE_1.fna contig_1278				18
sulstoni	CSP32.g9033.t1 CSP32.scaffold00536 7658-8192	IV	spp-10 (-)	spp-10 (-)	32
afra	CAFRA.g6699.t1 CAFRA.scaffold00219 ~152240-152647	IV	spp-10 (-)	spp-10 (-)
japonica	CJA32678 modified	IV	oat-1 (-) misannotated?	spp-10 (-)
uteleia	CSP31.g26083.t1 CSP31.scaffold03059 93881-93334	I	W09G3.6	W09G3.6	31
guadeloupensis	caenorhabditis_guadeloupensis_NIC113_clcSE_1 contig_15849	?	?	?	20
castelli	CCAST.g5365.t1 CCAST.scaffold00162 282939-281952		cest-7 (C23H4.4) (-)	gcy-36 (C46E1.2) (-)
angaria	CANGA.Cang_2012_03_13_00117 144189-144705	X	C23H4.8 (-)	gcy-36 (C46E1.2) (-)
quiockensis	CSP38.g2764.t1 scaffold__CSP38.scaffold00154 27563-27225	?	?	?	38
	CSP38.g2765.t1 scaffold__CSP38.scaffold00154 28987-28575	?	?	?
	CSP38.g2766.t1 scaffold__CSP38.scaffold00154 ~29915-29618	?	?	?
	CSP38.g13264.t1 scaffold__CSP38.scaffold01766 ~264906-265463	X	cest-8 (C23H4.2) (-)	gcy-36 (C46E1.2) (-)
vivipara	caenorhabditis_sp43_NIC1070_clcSE_1.fna contig_107943 incomplete	?	?	?	43
virilis	CVIRI.g320.t1	X	C64H3.2 (-)	C25G6.3 (-)
plicata	CPLIC.g3514.t1	X	C64H3.2 (-)	C25G6.3 (-)
bovis	CBOVI.g2669.t1	X	C64H3.2 (-)	C25G6.3 (-)
parvicauda	absent	n/a			21
monodelphis	absent	n/a
* the chromosomal location is inferred from the position of the orthologs of flanking genes in C. elegans

## Sheet: 22 bHLH Proteins
bHLH protein orthology groupsfor 10 nematode species as follows from the phylogenetic analysis performed in this study
chromosome in C. elegans	C. elegans	Sequence name	C. briggsae	C. japonica	C. castelli	C. parvicauda	C. monodelphis	C. bovis	D. coronatus**	O. tipulae	H. bacteriophora	notes on sequence conservation	domains
II	HLH-1	B0304.1	CBG13470	CJA13327	CCAST.g17139.t1	CSP21.g1652.t1_mod	CMONO.g1640.t1	CBOVI.g7048.t1	DCORO.DCO_013444	OTIPU.nOt.2.0.1.t14064_mod	HBACT.g13782.t1	conserved blocks throughout; H. bact is incomplete	bHLH flanked by disordered
I	HLH-2	M05B5.5	CBG21941_mod	CBG21941	CCAST.g6286.t1_mod	CSP21.g11828.t1	CMONO.g9739.t1	CBOVI.g9169.t1	DCORO.DCO_010917	OTIPU.nOt.2.0.1.t05583	HBACT.g9903.t1	only bHLH domain is conserved	bHLH near C terminus
								CBOVI.g9168.t1
II	HLH-3	T24B8.6	CBG03260	CJA04859	CCAST.g8028.t1	CSP21.g3871.t1	CMONO.g17941.t1	CBOVI.g12671.t1	DCORO.DCO_022557	OTIPU.nOt.2.0.1.t13971	HBACT.g9243.t1	only bHLH domain is conserved	bHLH flanked by disordered
III	HLH-4	T05G5.2	CBG10010	CJA10364_mod	CCAST.g11004.t1	CSP21.g16076.t1	CMONO.g541.t1	CBOVI.g4054.t1	DCORO.DCO_019106	OTIPU.nOt.2.0.1.t07970_mod*	HBACT.g10700.t1	conserved blocks throughout	only bHLH N-terminal
II	HLH-6	T15H9.3	CBG06671	CJA24967_mod	CCAST.g9699.t1	CSP21.g730.t1	CMONO.g18584.t1	CBOVI.g7495.t1	DCORO.DCO_021421	OTIPU.nOt.2.0.1.t12576	Hba_15973_mod*	C-terminal positions are conserved	bHLH near C terminus disordered N terminal
X	HLH-8	C02B8.4	CBG16905	CJA09725	CCAST.g14868.t1	CSP21.g6162.t1	CMONO.g3440.t1	CBOVI.g3147.t1	DCORO.DCO_022275	OTIPU.nOt.2.0.1.t11670	Hba_10160_mod*		only bHLH N-terminal
V	HLH-10	ZK682.4	CBG19244	CJA14004	CCAST.g3488.t1	CSP21.g411.t1	CMONO.g17438.t1	CBOVI.g1731.t1	absent	absent	HBACT.g14506.t1	only region around bHLH domain is conserved	two disordered bHLH towards C terminus
III	HLH-11	F58A4.7	CBG10034	CJA09019	CCAST.g6151.t1	CSP21.g4205.t1	CMONO.g7391.t1	CBOVI.g5783.t1	DCORO.DCO_017308	OTIPU.nOt.2.0.1.t05053	HBACT.g1379.t1_mod	conserved blocks throughout	bHLH flanked by disordered
IV	HLH-12	C28C12.8	CBG24484	CJA32678	CCAST.g14054.t1	absent	absent	CBOVI.g2669.t1	absent	absent	absent	only region around bHLH domain is conserved	disordered + bHLH
			CBG18500
X	HLH-13	F48D6.3	CBG14376	CJA18896	CCAST.g17294.t1	absent	CMONO.g5018.t1	CBOVI.g2946.t1	DCORO.DCO_022813	OTIPU.nOt.2.0.1.t00628	HBACT.g7088.t1	C-terminal positions are conserved. C. par and C. mon probably not correctly annotated	only bHLH middle
II	HLH-14	C18A3.8	CBG02491	CJA06159	CCAST.g1502.t1	CSP21.g7806.t1	CMONO.g17518.t1	CBOVI.g7086.t1	DCORO.DCO_022965*	OTIPU.nOt.2.0.1.t13972	HBACT.g9244.t1	conserved blocks throughout	bHLH flanked by disordered
										OTIPU.nOt.2.0.1.t08594*#
X	HLH-15	C43H6.8	CBG02112	CJA03864	CCAST.g1283.t1		CMONO.g18747.t1	CBOVI.g3438.t1	DCORO.DCO_024517		HBACT.g12728.t1	conserved blocks throughout, C. mon not correctly annotated	disordered + bHLH
I	HLH-16	DY3.3	CBG12364	CJA11661	CCAST.g3337.t1	CSP21.g7429.t1_mod	CMONO.g14526.t1	CBOVI.g9221.t1	DCORO.DCO_021735	OTIPU.nOt.2.0.1.t12043	HBACT.g3624.t1	conserved except C terminal portion; CC is conserved; several are probably not correctly annotated	disordered + bHLH+CC
IV	HLH-17	F38C2.2	CBG13666	CJA06811b	CCAST.g7874.t1	CSP21.g12813.t1_mod	CMONO.g4982.t1	CBOVI.g11588.t1	DCORO.DCO_024407	OTIPU.nOt.2.0.1.t03105	HBACT.g13557.t1	conserved throughout. C. ja not correctly annotated	only bHLH middle
X	HLH-19	F57C12.3	CBG27394	absent	CCAST.g14252.t1	CSP21.g607.t1	absent	absent	DCORO.DCO_018713	OTIPU.nOt.2.0.1.t12695	HBACT.g3938.t1	only region around bHLH domain is conserved, overall less conserved than other proteins	bHLH+CC
IV	HLH-31	F38C2.8	absent	absent	absent	absent	absent	absent	absent	absent	absent
IV	HLH-32	Y105C5B.29	absent	absent	absent	absent	absent	absent	absent	absent	absent
III	CND-1	C34E10.7	CBG21175	CJA09215	CCAST.g7749.t1	CSP21.g15409.t1	CMONO.g14216.t1	CBOVI.g5239.t1	DCORO.DCO_020739	OTIPU.nOt.2.0.1.t03625	HBACT.g1536.t1_mod	N-terminal ~120 positions conserved	bHLH + disordered
				CJA41949*
				CJA37655* lacks bHLH domain
X	HND-1	C44C10.8	CBG15519	CJA14734	CCAST.g12295.t1	CSP21.g6356.t1	CMONO.g12117.t1	CBOVI.g9885.t1	DCORO.DCO_018995	OTIPU.nOt.2.0.1.t05602	HBACT.g10282.t1	only region around bHLH domain is conserved, overall less conserved than other proteins	only bHLH N-terminal
			CBG19650
X	LIN-32	T14F9.5	CBG14057	CJA03891	CCAST.g9913.t1	CSP21.g16220.t1	CMONO.g6691.t1	CBOVI.g3817.t1	DCORO.DCO_021955	OTIPU.nOt.2.0.1.t04225	HBACT.g749.t1	some conservation N-terminal, region around bHLH domain highly conserved	disordered + bHLH
					CCAST.g14054.t1
					CCAST.g10913.t1
					CCAST.g10912.t1* annotation suspicious
IV	NGN-1	Y69A2AR.29	CBG13881	CJA04915	CCAST.g2000.t1	CSP21.g4967.t1	CMONO.g18496.t1	CBOVI.g11493.t1	DCORO.DCO_021565	OTIPU.nOt.2.0.1.t09066	HBACT.g9639.t1	only region around bHLH domain is conserved, H-bac not correctly annotated	bHLH flanked by disordered
V	HIF-1	F38A6.3	CBG05540	CJA15222	CCAST.g14663.t2	CSP21.g1577.t1	CMONO.g894.t1	CBOVI.g123.t1	DCORO.DCO_006081	OTIPU.nOt.2.0.1.t00426	HBACT.g2518.t1	N-terminal 420 positions highly conserved, other conserved blocks, all major domains conserved	bHLH+PAS1+PAS2+PAC
							CMONO.g525.t1* wrong?
* not included in phylogeny
** the genome seqence contains an allelic version of each protein
# Allelic
_mod = protein annotation from database modified

## Sheet: C. bovis bHLH location
Chromosomal locations of bHLH ortholgs in C. elegans and C. bovis
C. elegans protein	gene located on chromosome	C. bovis protein	gene located on contig	chromosome (Stevens et al. 2020)
HLH-1	II	CBOVI.g7048.t1	CBOVI.ctg00004	II
HLH-2	I	CBOVI.g9169.t1	CBOVI.ctg00006	I
HLH-2	I	CBOVI.g9168.t1	CBOVI.ctg00006	I
HLH-3	II	CBOVI.g12671.t1	CBOVI.ctg00013	II
HLH-4	III	CBOVI.g4054.t1	CBOVI.ctg00003	III
HLH-6	II	CBOVI.g7495.t1	CBOVI.ctg00004	II
HLH-8	X	CBOVI.g3147.t1	CBOVI.ctg00002	X
HLH-10	V	CBOVI.g1731.t1	CBOVI.ctg00001	V
HLH-11	III	CBOVI.g5783.t1	CBOVI.ctg00003	III
HLH-12	IV	CBOVI.g2669.t1	CBOVI.ctg00002	X
HLH-13	X	CBOVI.g2946.t1	CBOVI.ctg00002	X
HLH-14	II	CBOVI.g7086.t1	CBOVI.ctg00004	II
HLH-15	X	CBOVI.g3438.t1	CBOVI.ctg00002	X
HLH-16	I	CBOVI.g9221.t1	CBOVI.ctg00006	I
HLH-17	IV	CBOVI.g11588.t1	CBOVI.ctg00009	IV
HLH-19	X	absent
HLH-31	IV	absent
HLH-32	IV	absent
CND-1	III	CBOVI.g5239.t1	CBOVI.ctg00003	III
HND-1	X	CBOVI.g9885.t1	CBOVI.ctg00006	I
LIN-32	X	CBOVI.g3817.t1	CBOVI.ctg00002	X
NGN-1	IV	CBOVI.g11493.t1	CBOVI.ctg00009	IV
HIF-1	V	CBOVI.g123.t1	CBOVI.ctg00001	V
